1 **Different predictors of message fatigue across diverse risk areas for dengue**  
2 **prevention in Taiwan**

3

4

5 Chia-Hsien Lin<sup>1\*</sup>, Yen-Jung Chang<sup>1</sup>, Hung-Yi Lu<sup>2, 3\*</sup>

6 <sup>1</sup> Department of Health Promotion and Health Education, National Taiwan Normal  
7 University, Taipei City, Taiwan

8 <sup>2</sup> Department of Communication & Graduate Institute of Telecommunications, National  
9 Chung-Cheng University, Chiayi County, Taiwan

10 <sup>3</sup> School of Medicine, College of Medicine, National Sun Yat-Sen University, Kaohsiung  
11 City, Taiwan

12

13 \* Corresponding author

14 E-mail: [chiahsienlin@ntnu.edu.tw](mailto:chiahsienlin@ntnu.edu.tw) (CHL)

15 E-mail: [telhyl@ccu.edu.tw](mailto:telhyl@ccu.edu.tw) (Lu, H. Y.)

16

17

18

19

20

21

22

23

24

25

26

27

28

29

30

31

32

33

34

35

36

37

38

39

40

41

42

## 43 **Abstract**

### 44 **Background**

45 Different regions in Taiwan have varying levels of dengue risk; however, the same  
46 prevention messages were implemented nationwide for a prolonged period. People in  
47 areas with different risk levels may perceive the disease risk differently, and these  
48 perceptions may be linked to message fatigue. Individuals experiencing high levels of  
49 message fatigue may engage in fewer preventive activities. Although message fatigue has  
50 been studied concerning many infectious diseases, it has not been extensively researched  
51 in the context of dengue. Moreover, previous studies primarily focused on the general  
52 population regardless of risk level or on high-risk populations, with few examining  
53 message fatigue across areas with varying risk levels. Therefore, this study aimed to  
54 identify distinct predictors of message fatigue across different dengue-risk areas in  
55 Taiwan.

### 56 **Methodology/Principal Findings**

57 The online questionnaire was adapted from the measurement developed by So et al.,  
58 based on the conceptual definition of message fatigue. Message fatigue has two  
59 dimensions: message environment (ME) and audience response (AR). A negative  
60 binomial model was used to examine the association between the demographic variables  
61 (sex, residency, education, occupation, age, and income) and the perceived variables  
62 (perceived prevalence, perceived severity, and optimistic bias) with ME and AR  
63 separately.

64 The results showed that in high dengue-risk areas, individuals with an education level of  
65 high school or below reported significantly higher levels of AR compared to those  
66 educated higher than high school (1.10, 95% CI = 1.01–1.21). In medium dengue-risk  
67 areas, individuals in the optimism group were 1.12 times more likely (95% CI = 1.01–  
68 1.25) to report higher levels of ME than those in the realistic group. In low dengue-risk  
69 areas, younger individuals, males, and those with a high-school education or below  
70 reported significantly higher levels of AR.

### 71 **Conclusions/Significance**

72 This study revealed that dengue-message fatigue is associated with different variables  
73 across varying risk areas. These findings could inform global health communication  
74 strategies by identifying key demographic and perception-based predictors of message  
75 fatigue, enabling more targeted and effective public health messaging in regions with  
76 differing risk levels.

## 77 **Author summary**

78 In Taiwan, dengue is a significant public health concern, and different regions face  
79 varying levels of risk. Despite these differences, the same public health messages about  
80 dengue prevention are disseminated nationwide. In this study, we explored how people in  
81 areas with high, medium, and low risk of dengue of Taiwan respond to these messages,

82 specifically focusing on message fatigue—when individuals tire of repeated health  
83 messages and may stop following preventive advice. We found that individuals in high-  
84 risk areas with lower education levels reported more fatigue with these messages, while  
85 those in medium-risk areas who were optimistic about the disease were more likely to  
86 experience fatigue. In low-risk areas, younger individuals, males, and those with lower  
87 education levels were more likely to experience message fatigue. These findings can help  
88 global health authorities design better-targeted public health messages by considering  
89 how different groups respond to repeated health messaging, thereby making dengue  
90 prevention efforts more effective across various risk areas.

91

## 92 **Introduction**

93

94 Dengue is a significant communicable disease in Taiwan, with all suspected and  
95 confirmed cases reported to the Taiwan Centers for Disease Control (TW CDC) [1]. The  
96 entirety of Taiwan is susceptible to dengue due to two major mosquito vectors, *Aedes*  
97 *aegypti* and *Aedes albopictus* [1]. However, dengue incidence and prevalence vary across  
98 regions. The southern region, specifically Tainan, Kaohsiung, and Pingtung, accounted  
99 for over 98.6% of indigenous dengue cases between 1998 and 2023, followed by the  
100 northern, central, and eastern regions [1]. Studies have shown the highest prevalence  
101 rates were also in the southern region, while the central region generally had the lowest  
102 rates [2] [3]. Therefore, in this study, the southern, northern, and central regions served as  
103 proxies for high, medium, and low dengue risks, respectively. Throughout the text, we  
104 will refer to these regions as high, medium, and low-risk areas.

105

106 The current prevention and control strategies were established in 2003 [1]. These are  
107 maintained throughout the year and consist of information, education, and  
108 communication (IEC) activities, as well as routine vector control. The TW CDC conducts  
109 IEC activities, which include health education campaigns through television  
110 advertisements, radio announcements, posters, the Internet, and social media platforms.  
111 These activities are uniform across Taiwan. They aim to increase public awareness of  
112 self-protection measures, symptom recognition, and the management of water-holding  
113 containers on private properties. However, dengue continues to occur each year despite  
114 year-round IEC activities, suggesting that these efforts may need modification to find  
115 new approaches to motivate people to undertake prevention measures.

116

117 One reason that may reduce motivation to participate in disease prevention is message  
118 fatigue [4-6]. Message fatigue is a psychological state from prolonged exposure to similar  
119 or repetitive messages, resulting in negative reactions such as boredom, annoyance, and  
120 disengagement [7]. When individuals are overwhelmed with too many messages on the  
121 same topic, they may become mentally exhausted and bored, leading to message fatigue  
122 [8]. This state encompasses perceived overexposure, redundancy, exhaustion, and tedium  
123 [4, 7, 8]. Based on So et al.'s study, message fatigue consists of the dimensions of  
124 message environment (ME) and audience response (AR). The ME dimension describes a  
125 sense of being overwhelmed and frustrated by excessive and repetitive information about  
126 the message. The AR dimension indicates boredom and annoyance with continuous and  
127 uninteresting messages [7].

128

129 Several demographic factors, such as age, sex, education, job, and income level, have  
130 been identified as being associated with message fatigue [9-12]. However, the patterns of  
131 these demographic factors are not consistent across studies. For example, Stockman et al.  
132 aimed to examine the level of fatigue toward HIV-prevention messages among three  
133 high-risk populations: men who have sex with men, heterosexuals, and injection drug  
134 users (IDUs). The findings showed that younger IDUs had a higher level of HIV-  
135 prevention fatigue than older IDUs did [9]. In contrast, Steiner et al. aimed to determine  
136 whether the volume of automated text or interactive voice response messages influenced  
137 the likelihood of patients opting out of future messages, finding that the senior group  
138 (aged 55 and older) experienced a higher level of message fatigue than younger  
139 individuals (aged 18–34) did [10]. Regarding sex, a Polish study found that women  
140 reported significantly greater COVID-19 fatigue, particularly in terms of information  
141 fatigue [12], while men had higher levels of anti-tobacco message fatigue in the United  
142 States [11].

143

144 Message fatigue has been observed in prevention messages for infectious diseases [5, 8,  
145 9, 13-15]. For example, research by Guan et al. examined the impact of COVID-19  
146 message fatigue on people's intentions to engage in preventive behaviors [5]. The results  
147 showed that message fatigue leads to both reactance and inattention, which in turn  
148 negatively affect people's intentions to engage in preventive behaviors, mediating the  
149 relationship between message fatigue and these behavioral intentions [5]. Regarding HIV  
150 prevention messages, Stockman et al. aimed to examine HIV-prevention fatigue in  
151 community-based samples of three high-risk populations in San Francisco. The study  
152 found that IDU participants had a higher level of fatigue toward HIV-prevention  
153 messages compared to heterosexuals [9]. A report by UNICEF's Eastern and Southern  
154 Africa Regional Office showed that a prolonged period of community awareness  
155 regarding Ebola prevention resulted in message fatigue [15]. However, few studies on  
156 message fatigue have been conducted in the context of dengue.

157

158 Moreover, most studies on prevention messages for infectious diseases focus on the  
159 general population regardless of their risk levels or solely on high-risk populations  
160 concerning message fatigue. Few studies have evaluated message fatigue across groups  
161 with different risk levels, such as individuals residing in various areas but exposed to the  
162 same prolonged messaging. Groups with different risk levels may perceive disease risk  
163 differently, influenced by factors such as psychological and socio-economic conditions  
164 [16-18]. Additionally, perceptions of disease risks are associated with message fatigue [7,  
165 8]. Therefore, groups with different risk levels may experience varying levels of fatigue.

166

167 To inform future message designs, this study aimed to identify distinct predictors of  
168 message fatigue across various dengue-risk areas in Taiwan. The examined predictors  
169 included demographic variables such as age, sex, education, and income, as well as  
170 perceived risk variables, including optimistic bias, perceived prevalence, and perceived  
171 severity. This study could inform global health communication strategies by identifying  
172 key demographic and perception-based predictors of message fatigue, allowing for more  
173 targeted and effective public health messaging in diverse regions at varying risk levels.

174

## 175 **Materials and methods**

176

### 177 **Participants and procedure**

178 The study was part of a larger project involving an online survey on dengue perceptions  
179 and dengue-message fatigue. Participation was voluntary, and respondents were assured  
180 of confidentiality and anonymity. Participants were adults aged 18 and above residing in  
181 Taiwan, who reported their demographic information, perceived risks, and responses to  
182 questions assessing dengue-message fatigue. The questionnaire was distributed through  
183 the authors' social media networks, including Facebook and Line. A convenience  
184 sampling method was employed. The survey started on October 25, 2023, and ended on  
185 November 13, 2023.

186

### 187 **Measurements of variables**

#### 188 **Message fatigue**

189 The online questionnaire was adjusted based on the measurement developed by So et al.  
190 according to the conceptual definition of message fatigue [7]. Similar to the study by So  
191 et al., message-fatigue measurement included the ME and AR dimensions. Unlike the  
192 original study, in this study, the ME dimension consisted of six questions to represent  
193 overexposure and redundancy (S1 Table), with a Cronbach's alpha of 0.85. The reduction  
194 from the original nine questions to six was due to the translation process from English to  
195 Chinese, during which it was found that some questions could be combined or simplified  
196 without losing their original meaning. Therefore, the number of questions was reduced  
197 while maintaining the consistency and clarity of the content. For the AR dimension, the  
198 number of questions was reduced from seven to five, representing exhaustion and tedium  
199 in this study, for the same reason (S1 Table), with a Cronbach's alpha of 0.88. All  
200 questions were measured on a 5-point Likert scale ranging from 1 (strongly disagree) to 5  
201 (strongly agree) [7].

202

#### 203 **Perceived risks**

204 Perceived risks included perceived prevalence, perceived severity, and optimistic bias.  
205 Perceived prevalence was assessed with the question, "Do you think the current dengue  
206 outbreak in Taiwan is severe?" and perceived severity with, "Do you think the likelihood  
207 of death is high once infected with dengue?" Both were measured on 11-point Likert  
208 scales ranging from 0 (strongly disagree) to 10 (strongly agree).

209

210 Optimistic bias was evaluated with two questions: "How likely do you think it is that you  
211 will have a dengue infection?" and "How likely do you think it is that others around you  
212 will have a dengue infection?" These two questions were measured on 11-point Likert  
213 scales ranging from 0 (strongly unlikely) to 10 (strongly likely). The score of the first  
214 question was subtracted from that of the second to categorize optimistic bias into three  
215 groups: realistic (score zero), optimistic (positive score), and pessimistic (negative score).

216

#### 217 **Demographic variables**

218 Sex, residency, education, job, age, and income were the demographic variables. Sex was  
219 categorized as male and female. Residency was categorized into five regions: north,  
220 central, south, east, and outlying islands. Education was classified into two levels: higher  
221 than high school and equal to or below high school. Job experience was categorized as no  
222 job experience in dengue control and relevant job experience. Age and average household  
223 monthly income were continuous variables.

224

## 225 **Statistical analysis**

226 The dimensions of ME and AR were assessed separately, as the questions described  
227 different feelings. The independent variables were demographic factors and perceived  
228 risks. To identify the most suitable model, supervised backward selection with a  $\chi^2$  test at  
229 a 0.05 significance level was used with Poisson and negative binomial models. The  
230 Akaike Information Criterion (AIC) determined the final model, based on the lowest  
231 value. All model selections and tests were in R version 4.2.2 [19, 20].

232

## 233 **Ethics Statement**

234 This study utilized an online questionnaire that was previously reviewed and approved by  
235 the Research Ethics Committee (REC) of National Taiwan Normal University under  
236 approval number 202312HS019. As this study was conducted anonymously, no personal  
237 identifying information was collected through the online platform, ensuring participants'  
238 privacy and confidentiality. Participants were informed about the purpose of the research  
239 at the beginning of the online questionnaire, and their voluntary participation was implied  
240 by their completion of the survey. The study adhered to ethical principles for research  
241 involving human participants, particularly with respect to anonymity and the protection  
242 of data collected through online methods.

243

## 244 **Results**

245

246 During the survey, 818 individuals completed it and responded validly. Participants under  
247 the age of 18 (N = 4) and those residing in the eastern (N = 10) and outlying islands (N =  
248 3) were excluded. The exclusions based on residency in the eastern and outlying islands  
249 were for statistical considerations. Consequently, the final sample consisted of 801  
250 individuals.

251

252 Among the participants, females (N = 531) were more than males (N = 270). Most  
253 respondents had a higher education level than high school (N = 677), while a smaller  
254 portion had an education level equal to or below high school (N = 124). Additionally, a  
255 larger group reported no job experience in dengue control (N = 683) compared to those  
256 with relevant job experience (N = 118). In terms of residency, participants were  
257 distributed across the south (N = 466), central (N = 116), and north (N = 219) regions.  
258 The age range of participants was from 18 to 88 years, with an average age of 46.3 years.  
259 Both perceived prevalence and perceived severity of dengue ranged from 0 to 10, with  
260 mean scores of 6.5 and 5.0, respectively. Regarding the optimism bias variable, the  
261 majority of respondents were classified as realistic (N = 533), followed by those in the  
262 optimism (N = 205), and pessimism groups (N = 63).



263

## 264 **High dengue risk (i.e., southern region)**

265 The total number of participants in the high dengue-risk region was 466. More  
266 participants were female (N = 310), had a higher education level than high school (N =  
267 365), and lacked job experience in dengue control (N = 384), when compared to males (N  
268 = 156), those with an education level equal to or below high school (N = 101), and those  
269 with job experience in dengue control (N = 82). Participants' ages ranged from 18 to 83  
270 years, with an average age of 49.4 years. In terms of perceived risks, both perceived  
271 prevalence and perceived severity of dengue ranged from 0 to 10, with mean scores of  
272 6.9 and 5.0, respectively. The optimism bias variable showed that the largest proportion  
273 of participants were in the realistic group (N = 308), followed by the optimism (N = 121),  
274 and pessimism groups (N = 37).

275

276 For the ME dimension in the southern region, due to a lower AIC, the negative binomial  
277 model (AIC = 3063.30) was used instead of the Poisson model (AIC = 3257.76) for  
278 evaluating the associations. By applying the negative binomial model, no specific  
279 significant predictors were identified for the feelings of boredom and annoyance  
280 associated with dengue messages in southern Taiwan (Table 1).

281

Table 1. Negative binomial model for dengue-message fatigue considering message environment and audience response in southern Taiwan (N = 466).

| Southern region | Predictors                                   | Est   | SE    | Exp(Est) | 95% CI <sup>a</sup> |
|-----------------|----------------------------------------------|-------|-------|----------|---------------------|
| ME <sup>b</sup> | -                                            | -     | -     | -        | -                   |
| AR <sup>c</sup> | Education (equal to or below H vs. higher H) | 0.099 | 0.048 | 1.104    | 1.005 - 1.213       |

<sup>a</sup>95% CI referring to Exp(Est)

<sup>b</sup>Message environment

<sup>c</sup>Audience response

282

283 Given the lower AIC, the negative binomial model (AIC = 2891.50) was chosen over the  
284 Poisson model (AIC = 3112.21) to evaluate associations related to message fatigue in the  
285 AR of the southern region. The model indicated that individuals with an education level  
286 equal to or below high school reported significantly higher levels of boredom and  
287 annoyance compared to those with a higher education level (1.10, 95% CI = 1.01–1.21)  
288 in southern Taiwan (Table 1).

289

## 290 **Medium dengue risk (i.e., northern region)**

291 The region of medium dengue risk had 219 participants. Among them, females (N = 148)  
292 outnumbered males (N = 71). A lesser percentage of respondents (N = 7) had education  
293 levels equal to or below high school, whereas the majority (N = 212) had higher  
294 education levels. Furthermore, compared to those with relevant job experience (N = 13),

295 a larger group (N = 206) reported no prior experience in dengue control. Participants  
296 ranged in age from 18 to 88 years, with an average age of 39.5. With average scores of  
297 5.8 and 4.8, respectively, the perceived severity and prevalence of dengue ranged from 0  
298 to 10. A large proportion of respondents (N = 153) were categorized as realistic regarding  
299 the optimism bias variable, followed by those in the optimism (N = 52) and the  
300 pessimism groups (N = 14).

301

302 Due to a lower AIC for message fatigue when considering the ME, the negative binomial  
303 model (AIC = 1351.00) was applied rather than the Poisson model (AIC = 1392.81) to  
304 evaluate the association. The model showed that the optimistic bias variable ( $p = 0.027$ )  
305 was the only predictor. The result indicated that the optimism group was 1.122 times  
306 more likely (95% CI = 1.011–1.246) to feel frustrated by a large number of dengue  
307 messages than the realistic group. However, compared to the realistic group, the  
308 pessimism group did not feel significantly more frustrated with the overabundance of  
309 dengue messages (Table 2).

310

Table 2. Negative binomial model for dengue-message fatigue considering message environment and audience response in northern Taiwan (N = 219).

| Northern region | Predictors              | Est   | SE    | Exp(Est) | 95% CI <sup>a</sup> |
|-----------------|-------------------------|-------|-------|----------|---------------------|
| ME <sup>b</sup> |                         |       |       |          |                     |
|                 | Pessimism vs. Realistic | 0.174 | 0.091 | 1.190    | 0.990 - 1.423       |
|                 | Optimism vs. Realistic  | 0.115 | 0.053 | 1.122    | 1.011 - 1.246       |
| AR <sup>c</sup> |                         |       |       |          |                     |
|                 | -                       | -     | -     | -        | -                   |

<sup>a</sup>95% CI referring to Exp(Est)

<sup>b</sup>Message environment

<sup>c</sup>Audience response

311

312 Regarding AR, the negative binomial model (AIC = 1306.28) was chosen instead of the  
313 Poisson model (AIC = 1390.88). However, applying the negative binomial model did not  
314 identify any significant predictors for message fatigue in the AR of the north region  
315 (Table 2).

316

### 317 **Low dengue risk (i.e., central region)**

318 In the region with low dengue risk, more participants were female (N = 73), had higher  
319 education levels than high school (N = 100), and lacked job experience in dengue control  
320 (N = 93), when compared to males (N = 43), those with education levels equal to or  
321 below high school (N = 16), and those with job experience in dengue control (N = 23).  
322 Ages ranged from 18 to 79 years, with an average of 45.8 years. Perceived risks of  
323 dengue showed both prevalence and severity ranging from 0 to 10, with mean scores of  
324 6.4 and 5.0, respectively. The optimism bias variable indicated that the majority of  
325 participants fell into the realistic group (N = 72), followed by the optimism group (N =  
326 32), and the pessimism group (N = 12).



327

328 For ME in the central region, due to a lower AIC, the negative binomial model was  
329 chosen (AIC = 735.75) instead of the Poisson model (AIC = 639.12) for evaluating the  
330 associations. Significant predictors were age ( $p = 0.027$ ), sex ( $p = 0.033$ ), and education  
331 ( $p = 0.010$ ). Younger individuals (0.995, 95% CI = 0.991–0.999), males (1.145, 95% CI  
332 = 1.010–1.298), and people with education levels equal to or below high school (1.255,  
333 95% CI = 1.058–1.489) felt more frustrated with an overabundance of dengue messages  
334 compared to older individuals, females, and people with higher education levels (Table  
335 3).

336

Table 3. Negative binomial model for dengue-message fatigue considering message environment and audience response in central Taiwan (N = 116).

| Central Region  | Predictors                                   | Est   | SE    | Exp(Est) | 95% CI <sup>a</sup> |
|-----------------|----------------------------------------------|-------|-------|----------|---------------------|
| ME <sup>b</sup> |                                              |       |       |          |                     |
|                 | Age                                          | 0.005 | 0.002 | 0.995    | 0.991 - 0.999       |
|                 | Sex (M vs. F)                                | 0.135 | 0.064 | 1.145    | 1.010 - 1.298       |
|                 | Education (equal to or below H vs. higher H) | 0.227 | 0.087 | 1.255    | 1.058 - 1.489       |
| AR <sup>c</sup> |                                              |       |       |          |                     |
|                 | -                                            | -     | -     | -        | -                   |

<sup>a</sup>95% CI referring to Exp(Est)

<sup>b</sup>Message environment

<sup>c</sup>Audience response

337

338 It was decided to use the negative binomial model (AIC = 706.53) rather than the Poisson  
339 model (AIC = 759.88) to assess associations related to message fatigue in the AR  
340 dimension due to the lower AIC. However, by applying the negative binomial model, no  
341 significant predictors for message fatigue in the AR of the central region were identified  
342 (Table 3).

343

## 344 Discussion

345

346 In this cross-sectional study, we assessed the two dimensions of message fatigue across  
347 different regions, which represented varying levels of dengue risk, and analyzed them in  
348 relation to demographic factors and perceived risks. The study found that predictors of  
349 message fatigue varied across regions with different levels of dengue risk. In the high  
350 dengue-risk region, no significant predictors were identified for the ME dimension, while  
351 education was a significant predictor for AR. Combining ME and AR, in the high  
352 dengue-risk region, people with an education level equal to or below high school had  
353 higher message fatigue compared to those with a higher education level (above high  
354 school). In the medium dengue-risk region, optimism bias was the only predictor for the  
355 ME dimension, and AR had no predictor. This indicates that people in the optimism  
356 group were more likely to experience dengue-message fatigue compared to those in the

357 realistic group. In the low dengue-risk region, age, sex, and education were significant  
358 predictors for ME, while no significant predictors were identified for the AR dimension.  
359 This means that younger individuals, males, and people with an education level equal to  
360 or below high school had a higher level of message fatigue.

361

362 This study showed that individuals with lower education levels had higher dengue-  
363 message fatigue in the southern and central regions, which represented high and low  
364 dengue risks, respectively. The tendency for individuals with lower education levels to  
365 experience higher health-message fatigue could be attributed to several factors. One  
366 factor is that individuals with lower education levels may have less prior knowledge or  
367 experience with health-related topics. According to Cognitive Load Theory [21], the  
368 cognitive effort required to process, understand, and integrate new health information is  
369 greater for these. This increased cognitive load may limit their ability to fully  
370 comprehend and engage with health messages, leading to mental exhaustion, confusion,  
371 and fatigue [21, 22]. Another factor could be psychological exhaustion. The  
372 psychological impact of prolonged exposure to health messages can cause burnout.  
373 Individuals with low education levels might not have the coping mechanisms [23, 24] or  
374 support systems [23, 25] to process ongoing health communications effectively.  
375 Therefore, they may experience this fatigue more acutely. To mitigate their fatigue,  
376 simple [21], relevant [26], and engaging [27] dengue messages could be considered.

377

378 Younger individuals in low dengue-risk central Taiwan exhibited a higher level of  
379 dengue-message fatigue in this study. While this phenomenon has not been specifically  
380 observed in dengue messaging, it has been seen in other types of messages, such as anti-  
381 tobacco [11] and COVID-19 vaccine booster uptake [28]. The tendency of younger  
382 individuals to experience greater message fatigue may be because they, especially those  
383 active on social media and other digital platforms [29], are often exposed to a higher  
384 volume of information than older individuals are. Repeated exposure to the same or  
385 similar messages, such as those related to dengue, can lead to saturation and fatigue when  
386 the messages no longer feel relevant or urgent. Additionally, younger people often  
387 perceive themselves as less vulnerable to diseases [30, 31]. If they believe they are not at  
388 significant risk, they may view repeated messages as unnecessary or irrelevant, leading to  
389 disengagement and fatigue. Furthermore, in Taiwan, the way dengue prevention  
390 messages are framed or delivered might not resonate well with younger audiences. If the  
391 communication does not align with their interests, values, or preferred communication  
392 channels, it can lead to disinterest and fatigue [32, 33]. Messages could be designed in  
393 formats and delivery channels that align with younger people's digital habits and interests  
394 [34, 35]. By making the messages feel fresh, relevant, and interactive, the campaign can  
395 better combat message fatigue and effectively engage this group [36-39].

396

397 In addition to younger individuals, males were also identified as predictors of dengue-  
398 message fatigue in central Taiwan (i.e., low dengue risk), compared to females. This  
399 finding is interesting because most studies report higher message fatigue in females [12,  
400 40, 41], with fewer examples of fatigue in males [11]. In this study, males exhibited a  
401 higher level of message fatigue, which could be due to the fact that males are less likely  
402 than females to seek out health information actively in Taiwan [42, 43]. Therefore, when

403 males are exposed to health messages, they might find them more overwhelming, leading  
404 to quicker fatigue. Another possible explanation is that males may not engage with health  
405 messages on an emotional level as deeply as females do [44, 45]. This lack of  
406 engagement could lower the threshold for perceiving messages as repetitive or  
407 unimportant, thus increasing fatigue. Males may also be more resistant to certain types of  
408 health messaging, particularly those that challenge their independence or self-reliance.  
409 For example, messages that encourage using mosquito repellents, wearing long sleeves,  
410 or using bed nets might be seen as an imposition on their usual routines or as suggesting  
411 that they cannot protect themselves without these aids. This resistance can increase  
412 fatigue because they might perceive these messages as unnecessary.

413  
414 Individuals in the optimism group were more prone to experiencing dengue-message  
415 fatigue compared to those in the realistic group in northern Taiwan (i.e., medium dengue  
416 risk), according to this study. In the optimism group, people tend to believe they are less  
417 likely to be affected by negative outcomes compared to others, such as getting infected  
418 with dengue [46, 47]. Therefore, even in areas with high prevalence, they may think, "It  
419 won't happen to me," lowering the perception of personal risk. In our sample, people  
420 living in the northern region had the lowest level of perceived prevalence for dengue  
421 compared to other regions, supporting this idea. This optimism bias results in message  
422 fatigue because it causes individuals to perceive health messages as irrelevant or  
423 unnecessary. This perception reduces their engagement with the messages and increases  
424 their resistance to the content, leading to fatigue. Another possibility is that optimistic  
425 individuals may believe that their actions are sufficient to protect them, leading them to  
426 disregard additional advice or warnings. This overconfidence reduces their receptivity to  
427 ongoing messages, causing fatigue [48]. For this group, messages framed around  
428 potential losses could be more impactful for those who might feel overly optimistic about  
429 their situation. In other words, if messages focus on what they could lose, such as their  
430 health, well-being, or the safety of their loved ones if they don't act, it could help them  
431 take the situation more seriously and avoid being too relaxed about it.

432 This study demonstrated different demographic and perception-based predictors for  
433 message fatigue across regions with varying risk levels. This implies that messages must  
434 be tailored to specific risk regions to achieve effective health communication. However,  
435 this study has some limitations. First, while message fatigue was the focus of this study,  
436 which could reduce motivation to participate in disease prevention, another possibility  
437 that could also lower motivation is the boomerang effect. This effect occurs when people  
438 believe their freedom is at risk, leading them to resist the advice of a message. Second,  
439 this survey used convenience sampling. While convenience sampling is easy to use and  
440 inexpensive, making it beneficial in exploratory research, it is a nonprobability sampling  
441 technique. Therefore, the samples in this study might not accurately reflect the entire  
442 population (all Taiwanese citizens aged 18 years or older). Third, the survey was  
443 conducted using an online questionnaire. Respondents might misunderstand questions,  
444 leading to inaccurate or inconsistent data. To minimize this misunderstanding, various  
445 individuals pre-tested the questionnaire. Lastly, these findings can identify associations  
446 between message fatigue and other variables, but they cannot establish causality.

447

448

## 449 **References**

450

- 451 1. Centers for Disease Control ROCT. Guidelines for Dengue / Chikungunya  
452 Control 2024 [Chinese]. Taiwan: Centers for Disease Control, R.O.C. (Taiwan); 2024.
- 453 2. Hsu JC, Hsieh CL, Lu CY. Trend and geographic analysis of the prevalence of  
454 dengue in Taiwan, 2010-2015. *Int J Infect Dis*. 2017;54:43-9. doi:  
455 doi.org/10.1016/j.ijid.2016.11.008.
- 456 3. Lee Y-H, Hsieh Y-C, Chen C-J, Lin T-Y, Huang Y-C. Retrospective  
457 Seroepidemiology study of dengue virus infection in Taiwan. *BMC Infectious Diseases*.  
458 2021;21(1):96. doi: 10.1186/s12879-021-05809-1.
- 459 4. Mao B, Jia X, Huang Q. How do information overload and message fatigue  
460 reduce information processing in the era of COVID-19? An ability–motivation approach.  
461 *J Inf Sci*. 2022. doi: doi.org/10.1177/01655515221118047.
- 462 5. Guan M, Li Y, Scoles JD, Zhu Y. COVID-19 message fatigue: How does it  
463 predict preventive behavioral intentions and what types of information are people tired of  
464 hearing about? *Health Communication*. 2023;38(8):1631-40. doi:  
465 10.1080/10410236.2021.2023385.
- 466 6. Jia X, Ahn S, Carcioppolo N. Measuring information overload and message  
467 fatigue toward COVID-19 prevention messages in USA and China. *Health Promot Int*.  
468 2023;38(3). Epub 2022/01/30. doi: 10.1093/heapro/daac003.
- 469 7. So J, Kim S, Cohen H. Message fatigue: Conceptual definition,  
470 operationalization, and correlates. *Communication Monographs*. 2017;84(1):5-29. doi:  
471 10.1080/03637751.2016.1250429.
- 472 8. Sun J, Lee SK. “No more COVID-19 messages via social media, please”: the  
473 mediating role of COVID-19 message fatigue between information overload, message  
474 avoidance, and behavioral intention. *Current Psychology*. 2023;42(24):20347-61. doi:  
475 10.1007/s12144-023-04726-7.
- 476 9. Stockman JK, Schwarcz SK, Butler LM, de Jong B, Chen SY, Delgado V, et al.  
477 HIV prevention fatigue among high-risk populations in San Francisco. *J Acquir Immune*  
478 *Defic Syndr*. 2004;35(4):432-4. Epub 2004/04/21. doi: 10.1097/00126334-200404010-  
479 00016.
- 480 10. Steiner JF, Zeng C, Comer AC, Barrow JC, Langer JN, Steffen DA, et al. Factors  
481 associated with opting out of automated text and telephone messages among adult  
482 members of an integrated health care system. *JAMA Network Open*. 2021;4(3):e213479-  
483 e. doi: 10.1001/jamanetworkopen.2021.3479.
- 484 11. So J, Popova L. A profile of individuals with anti-tobacco message fatigue.  
485 *American journal of health behavior*. 2018;42(1):109-18.
- 486 12. Domosławska-Żylińska K, Krysińska-Pisarek M, Włodarczyk D. Gender-  
487 specificity of fatigue and concerns related to the COVID-19 pandemic-A report on the  
488 Polish population. *Int J Environ Res Public Health*. 2023;20(7). Epub 2023/04/14. doi:  
489 10.3390/ijerph20075407.
- 490 13. Macapagal K, Birkett M, Janulis P, Garofalo R, Mustanski B. HIV prevention  
491 fatigue and HIV treatment optimism among young men who have sex with men. *AIDS*  
492 *Educ Prev*. 2017;29(4):289-301. Epub 2017/08/22. doi: 10.1521/aeap.2017.29.4.289.

- 493 14. Kim JH, Kwok KO, Huang Z, Poon PK, Hung KKC, Wong SYS, et al. A  
494 longitudinal study of COVID-19 preventive behavior fatigue in Hong Kong: a city with  
495 previous pandemic experience. *BMC Public Health*. 2023;23(1):618. Epub 2023/04/03.  
496 doi: 10.1186/s12889-023-15257-y.
- 497 15. ESARO U. Risk Communication and community engagement for Ebola virus  
498 disease preparedness and response-lessons learnt and recommendations from Burundi,  
499 Rwanda, South Sudan, Tanzania and Uganda 2020. Available from:  
500 [https://www.unicef.org/esa/reports/risk-communication-and-community-engagement-](https://www.unicef.org/esa/reports/risk-communication-and-community-engagement-ebola-virus-disease-preparedness-and-response)  
501 [ebola-virus-disease-preparedness-and-response](https://www.unicef.org/esa/reports/risk-communication-and-community-engagement-ebola-virus-disease-preparedness-and-response).
- 502 16. Yin JD-C, Lui JN-M. Factors influencing risk perception during Public Health  
503 Emergencies of International Concern (PHEIC): a scoping review. *BMC Public Health*.  
504 2024;24(1):1372. doi: 10.1186/s12889-024-18832-z.
- 505 17. Vornanen M, Konttinen H, Peltonen M, Haukkala A. Diabetes and cardiovascular  
506 disease risk perception and risk indicators: A 5-Year follow-up. *International Journal of*  
507 *Behavioral Medicine*. 2021;28(3):337-48. doi: 10.1007/s12529-020-09924-2.
- 508 18. Adachi M, Murakami M, Yoneoka D, Kawashima T, Hashizume M, Sakamoto H,  
509 et al. Factors associated with the risk perception of COVID-19 infection and severe  
510 illness: A cross-sectional study in Japan. *SSM Popul Health*. 2022;18:101105. Epub  
511 2022/05/03. doi: 10.1016/j.ssmph.2022.101105.
- 512 19. Venables WN, Ripley BD. *Modern Applied Statistics with S*. Fourth ed: Springer;  
513 2002.
- 514 20. Team RC. *R: A language and environment for statistical computing*. R  
515 Foundation for Statistical Computing, Vienna, Austria. URL <https://www.R-project.org/>  
516 2022.
- 517 21. Sweller J. Cognitive load theory, learning difficulty, and instructional design.  
518 *Learning and Instruction*. 1994;4(4):295-312. doi: doi.org/10.1016/0959-4752(94)90003-  
519 5.
- 520 22. Cutler DM, Lleras-Muney A. Understanding differences in health behaviors by  
521 education. *J Health Econ*. 2010;29(1):1-28. Epub 2009/12/08. doi:  
522 10.1016/j.jhealeco.2009.10.003.
- 523 23. Drageset S, Lindstrøm TC. Coping with a possible breast cancer diagnosis:  
524 demographic factors and social support. *Journal of Advanced Nursing*. 2005;51(3):217-  
525 26. doi: doi.org/10.1111/j.1365-2648.2005.03495.x.
- 526 24. De-Nour AK. Prediction of adjustment to chronic hemodialysis.  
527 *Psychoneurology*. 1981;1:117-31.
- 528 25. Katapodi MC, Facione NC, Miaskowski C, Dodd MJ, Waters C. The influence of  
529 social support on breast cancer screening in a multicultural community sample. *Oncol*  
530 *Nurs Forum*. 2002;29(5):845-52. Epub 2002/06/12. doi: 10.1188/02.Onf.845-852.
- 531 26. Chant R, Zoellner BP. Teaching content methods in a high school PDS:  
532 navigating curricular tensions. *Northwest Journal of Teacher Education*. 2023;18(1). doi:  
533 doi.org/10.15760/nwjte.2023.18.1.3
- 534 27. Khalid M, Akhter. M, Hashmi A. Teaching styles of secondary school English  
535 teachers and learning styles of their students and relationship of teaching learning style  
536 match with students' achievement. *Bulletin of Education and Research*. 2017;39(3):203-  
537 20.



- 538 28. Zhao X, Kadono M, Kranzler EC, Pavisic I, Miles S, Maher M, et al. Message  
539 fatigue and COVID-19 vaccine booster uptake in the United States. *Journal of Health*  
540 *Communication*. 2024;29(1):61-71. doi: 10.1080/10810730.2023.2282036.
- 541 29. Fletcher R, Nielsen RK. Are people incidentally exposed to news on social  
542 media? A comparative analysis. *New Media & Society*. 2018;20(7):2450-68. doi:  
543 10.1177/1461444817724170.
- 544 30. Commodari E, La Rosa VL, Coniglio MA. Health risk perceptions in the era of  
545 the new coronavirus: are the Italian people ready for a novel virus? A cross-sectional  
546 study on perceived personal and comparative susceptibility for infectious diseases. *Public*  
547 *Health*. 2020;187:8-14. doi: doi.org/10.1016/j.puhe.2020.07.036.
- 548 31. Duncan LA, Schaller M. Prejudicial attitudes toward older adults may be  
549 exaggerated when people feel vulnerable to infectious disease: Evidence and  
550 implications. *Analyses of Social Issues and Public Policy*. 2009;9(1):97-115. doi:  
551 doi.org/10.1111/j.1530-2415.2009.01188.x.
- 552 32. Mikels JA, Shuster MM, Thai ST, Smith-Ray R, Waugh CE, Roth K, et al.  
553 Messages that matter: Age differences in affective responses to framed health messages.  
554 *Psychology and Aging*. 2016;31(4):409-14. doi: 10.1037/pag0000040.
- 555 33. Shamaskin AM, Mikels JA, Reed AE. Getting the message across: Age  
556 differences in the positive and negative framing of health care messages. *Psychology and*  
557 *Aging*. 2010;25(3):746-51. doi: 10.1037/a0018431.
- 558 34. Pereira D, Fillol J, Moura P. Young people learning from digital media outside of  
559 school: the informal meets the formal. *Comunicar: Media Education Research Journal*.  
560 2019;27(58):41-50.
- 561 35. Boulianne S, Theocharis Y. Young people, digital media, and engagement: A  
562 meta-analysis of research. *Social science computer review*. 2020;38(2):111-27.
- 563 36. Livingstone S, Bober M, Helsper EJ. Active participation or just more  
564 information? Young people's take-up of opportunities to act and interact on the Internet.  
565 *Information, Community & Society*. 2005;8(3):287-314. doi:  
566 doi.org/10.1080/13691180500259103.
- 567 37. Willoughby JF, L'Engle KL. Influence of perceived interactivity of a sexual  
568 health text message service on young people's attitudes, satisfaction and repeat use.  
569 *Health education research*. 2015;30(6):996-1003. doi: 10.1093/her/cyv056.
- 570 38. Guillory J, Henes A, Farrelly MC, Fiacco L, Alam I, Curry L, et al. Awareness of  
571 and receptivity to the fresh empire tobacco public education campaign among hip hop  
572 youth. *Journal of Adolescent Health*. 2020;66(3):301-7. doi:  
573 10.1016/j.jadohealth.2019.09.005.
- 574 39. Guo M, Ganz O, Cruse B, Navarro M, Wagner D, Tate B, et al. Keeping it fresh  
575 with hip-hop teens: Promising targeting strategies for delivering public health messages  
576 to hard-to-reach audiences. *Health Promotion Practice*. 2020;21(1\_suppl):61S-71S.
- 577 40. More KR, More C, Burd KA, Mentzou A, Phillips LA. Does messaging matter? A  
578 registered report on appearance-versus health-based message framing in exercise appeals  
579 targeted towards women. *Psychology of Sport and Exercise*. 2024;70:102555. doi:  
580 doi.org/10.1016/j.psychsport.2023.102555.
- 581 41. So J, Alam N. Predictors and effects of anti-obesity message fatigue: A thought-  
582 listing analysis. *Health Communication*. 2019;34(7):755-63. doi:  
583 10.1080/10410236.2018.1434736.



- 584 42. Chen PH, Huang SM, Lai JC, Lin WL. Determinants of health-seeking behavior  
585 toward Chinese or Western medicine in Taiwan: An analysis of biobank research  
586 database. *Complement Ther Clin Pract*. 2022;48:101592. Epub 2022/04/20. doi:  
587 10.1016/j.ctcp.2022.101592.
- 588 43. Kuan YC, Yen DJ, Yiu CH, Lin YY, Kwan SY, Chen C, et al. Treatment-seeking  
589 behavior of people with epilepsy in Taiwan: A preliminary study. *Epilepsy Behav*.  
590 2011;22(2):308-12. Epub 2011/08/05. doi: 10.1016/j.yebeh.2011.06.034.
- 591 44. McKenzie SK, Collings S, Jenkin G, River J. Masculinity, social connectedness,  
592 and mental health: Men's diverse patterns of practice. *Am J Mens Health*.  
593 2018;12(5):1247-61. Epub 2018/05/01. doi: 10.1177/1557988318772732.
- 594 45. Gough B, Novikova I. Mental health, men and culture: how do sociocultural  
595 constructions of masculinities relate to men's mental health help-seeking behaviour in the  
596 WHO European Region? Copenhagen: World Health Organization. Regional Office for  
597 Europe; 2020.
- 598 46. Weinstein ND. Unrealistic optimism about susceptibility to health problems:  
599 conclusions from a community-wide sample. *J Behav Med*. 1987;10(5):481-500. Epub  
600 1987/10/01. doi: 10.1007/bf00846146.
- 601 47. Prentice KJ, Gold JM, Carpenter WT, Jr. Optimistic bias in the perception of  
602 personal risk: patterns in schizophrenia. *Am J Psychiatry*. 2005;162(3):507-12. Epub  
603 2005/03/03. doi: 10.1176/appi.ajp.162.3.507.
- 604 48. Özaltun E. Overconfidence, self-knowledge, and self-improvement. *Palgrave*  
605 *Communications*. 2017;3(1):42. doi: 10.1057/s41599-017-0049-5.

606

## 607 **Supporting information**

608

609 **S1 Table. Dimensions and questions of message fatigue. Questions adapted from So**  
610 **et al.**

611 **S2 Table. Dataset**

612 **S3 Table. Variables, codes and categories in the dataset**
